# Supplementary material for: Passivation layers for nanostructured photoanodes: ultra-thin oxides on InGaN nanowires
Source: Royal Society of Chemistry journal article supplement (doi:10.1039/c7ta08071a), 2017-12-06
Supplement: c7ta08071a1.pdf [file c7ta08071a1.pdf]

## Supporting Information

### Passivation layers for nanostructured photoanodes: ultra-thin oxides on InGaN nanowires

*Paula Neuderth\*, Pascal Hille, Jörg Schörmann, Adina Frank, Christian Reitz, Sara Martí-Sánchez, María de la Mata, Mariona Coll, Jordi Arbiol, Roland Marschall, and Martin Eickhoff*

#### S1. Bias Dependent PL and PC of Al<sub>2</sub>O<sub>3</sub>-Coated InGaN NWs

Al<sub>2</sub>O<sub>3</sub>-coated samples show almost no bias dependence in PC and PL measurements, suggesting that a change in band bending induced by the applied bias has only small influence on the amount of carrier transfer into the electrolyte. This supports the assumption that band transfer from the InGaN material into the Al<sub>2</sub>O<sub>3</sub> coating is suppressed.

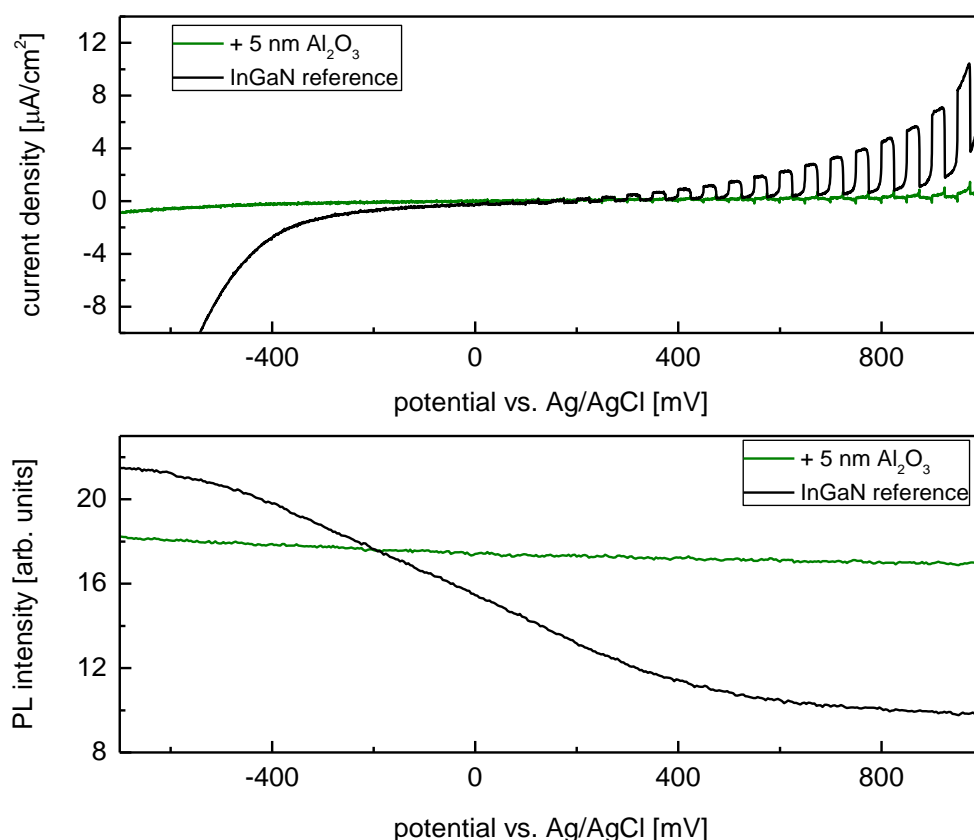

**Figure S1.** Bias dependent measurements of PC and PL on Al<sub>2</sub>O<sub>3</sub>-coated InGaN nanowires compared to the uncoated reference sample. (a) Illuminated with a 523 nm LED; (b) Illuminated with a 405 nm laser diode.

## S2. Photocurrent of 10 nm Al<sub>2</sub>O<sub>3</sub>-coated InGaN Nanowires

For 10 nm Al<sub>2</sub>O<sub>3</sub>-coated samples no PC was observed. This supports the theory that the hole transfer is blocked by the valence band offset and also that the hole transport in the case of nominally 5 nm thick Al<sub>2</sub>O<sub>3</sub> coatings is caused by tunnelling through thin areas of the coating that exist due to the surface roughness.

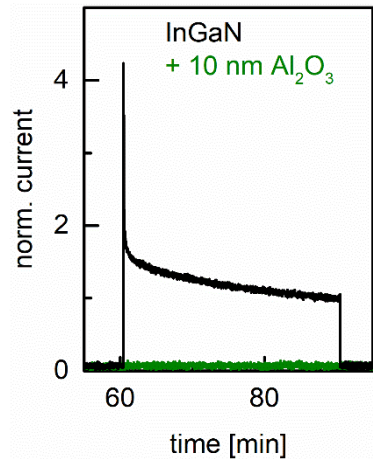

**Figure S2.** Photocurrent of 10 nm Al<sub>2</sub>O<sub>3</sub>-coated sample compared to uncoated reference sample. Measurement at 700 mV.

## S3. EELS of CeO<sub>2</sub>-Coated InGaN NWs

The EELS measurement of CeO<sub>2</sub>-coated NWs shows a high Ce<sup>3+</sup> signal, especially at the surface documenting a high degree of Ce<sup>3+</sup> defects/sites and resulting oxygen vacancies in the ceria coating.

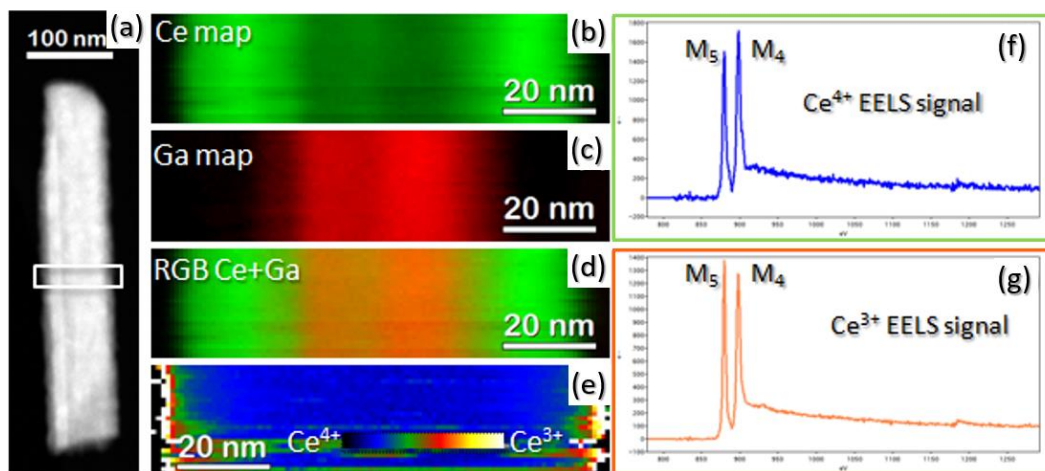

**Figure S2.** EELS mapping of CeO<sub>2</sub>-coated InGaN nanowires. The area marked in (a) was investigated in (b-g). In (e) the Ce<sup>4+</sup> and Ce<sup>3+</sup> signals are separated. Original Ce<sup>4+</sup> and Ce<sup>3+</sup> spectra are displayed in (f) and (g) resp.

#### S4. Tauc Plots for Determination of Band Gaps

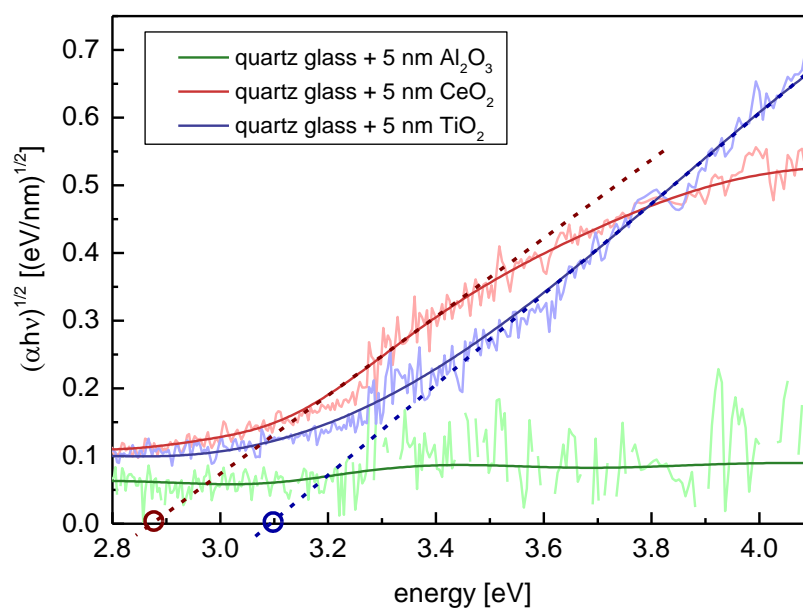

**Figure S3.** Tauc-Plots for the determination of the indirect band gaps of  $\text{CeO}_2$  and  $\text{TiO}_2$ . Transmission measurements were performed on 5 nm thin oxide films prepared with ALD on quartz glass.
